# Supplementary material
Source: PubMed Central journal article supplement (PMC3932927)
Supplement: 1324176111_pnas.201324176SI.pdf [file 1324176111_pnas.201324176SI.pdf]

# Supporting Information

Gostissa et al. 10.1073/pnas.1324176111

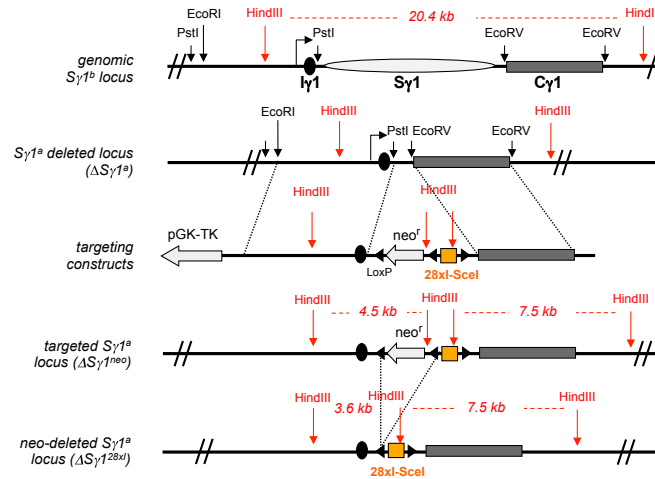

**Fig. S1.** Targeting strategy for replacement of *Sy1* with a 28 $\times$  I-SceI site cassette. Targeting strategy for insertion of 28 I-SceI sites in place of *Sy1*, as previously described (1). Position of HindIII-cut sites used for diagnostic digests is indicated in red. *LoxP* sites are indicated by black triangles, and I-SceI site cassettes, by orange boxes (not drawn to scale).

1. Zarrin AA, et al. (2007) Antibody class switching mediated by yeast endonuclease-generated DNA breaks. *Science* 315(5810):377–381.

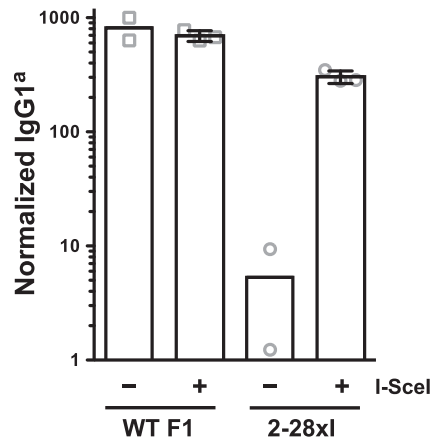

**Fig. S2.** Efficient I-SceI-mediated class switching in *IgH<sup>2-28xl</sup>* B cells. Class switching to IgG1<sup>a</sup> as measured by ELISA on supernatants from day 4 LPS/IL-4 B-cell cultures of the indicated genotypes, infected with either control (–) or I-SceI-expressing (+) retrovirus. Each IgG1<sup>a</sup> data point was normalized against levels of Ig light chains in the same supernatant to control for cell number variation. Error bars represent SD.



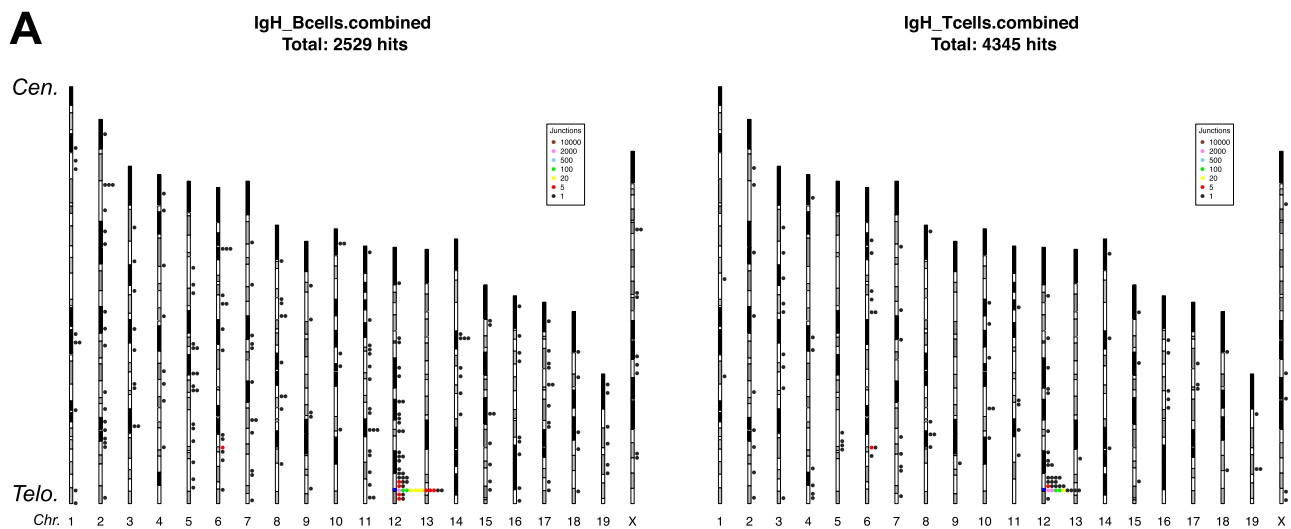

**B**

| MOUSE N. | CELL TYPE | TOTAL JUNCT. | breaksite (300kb) | 28x I (30kb) | 2x I (30kb) |
|----------|-----------|--------------|-------------------|--------------|-------------|
| 23       | B         | 483          | 438               | 213          | 202         |
| 21       | B         | 1115         | 1007              | 517          | 411         |
| 19       | B         | 933          | 831               | 388          | 400         |
| 23       | T         | 387          | 371               | 215          | 150         |
| 21       | T         | 2707         | 2625              | 1623         | 974         |
| 19       | T         | 1253         | 1219              | 727          | 478         |

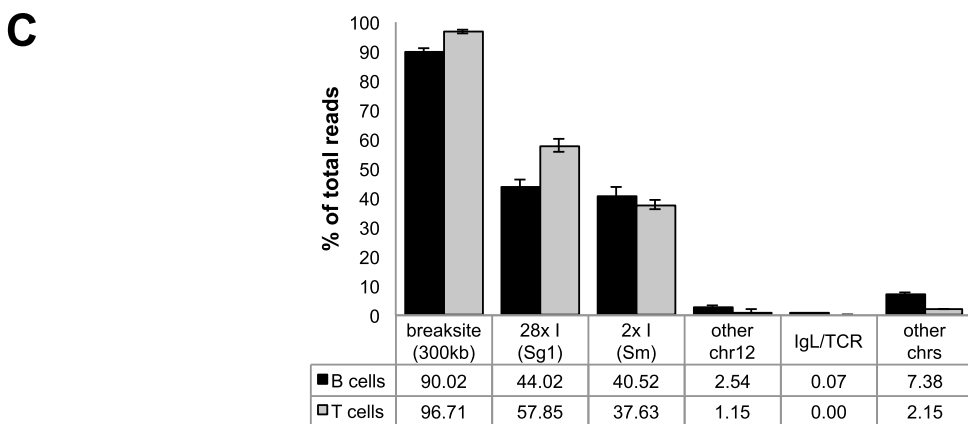

**D**

|                | TOTAL JUNCTIONS | 2xl (30kb) | 2xl (220bp) | Perfect Joins |
|----------------|-----------------|------------|-------------|---------------|
| <b>B cells</b> | 2529            | 1013       | 568 (56%)   | 10 (0.99%)    |
| <b>T cells</b> | 4345            | 1602       | 708 (44%)   | 4 (0.25%)     |

**Fig. 54.** High-throughput genome-wide translocation sequencing (HTGTS) libraries from  $IgH^{2\text{-}28\text{x}1}$  B and T cells. (A) Maps of translocations originating from the  $IgH^{2\text{-}28\text{x}1}$  cassette in  $\alpha$ -CD40/IL-4-activated B cells (Left) or Con A/IL-2-activated T cells (Right). Single translocation junctions are represented by dots located at the corresponding chromosomal position. The bin size is 2 Mb. Clusters of translocations are indicated with color codes, as shown in the legend. *Cen.*, centromere; *Telo.*, telomere. Data are combined from three libraries per each condition. (B and C) Table and graph showing the numbers and distribution of junctions obtained in the three independent  $IgH^{2\text{-}28\text{x}1}$  B-cell and T-cell HTGTS libraries. The  $IgH$  break site is defined as a 300-kb region comprising the  $IgH$  locus and including both 2x and 28x I-SceI cassettes ( $Chr12:114,450,000\text{--}114,750,000$ ). The 2x I-SceI break site in place of  $S\mu$  (2xI) is defined as a 30-kb region from position 114,645,000 to 114,675,000, including the 2xI cassette and the whole  $S\mu$  sequence (present *in trans* on the nonmodified  $IgH$  allele). The 28x I-SceI break site in place of  $S\gamma 1$  (28xI) is defined as a 30-kb region from position 114,552,000 to 114,582,000, not including the 28xI cassette but including the whole  $S\gamma 1$  sequence (present *in trans* on the nonmodified  $IgH$  allele). In C, error bars represent SD; numbers in the table indicate the average percentage from three independent libraries. "other chr12" refers to reads on chromosome 12 outside the 300-kb break site; "IgL/TCR," to reads on other  $Ig$  and  $TCR$  loci; and "others," to reads in all other chromosomal locations. (D) Table showing extent of end processing of 2xI break site junctions in combined B- and T-cell HTGTS libraries. Numbers in parentheses indicate percentages relative to the total number of junctions in the 30-kb 2xI break site.
